# Supplementary material for: Serum calcitonin gene-related peptide in patients with persistent post-concussion symptoms, including headache: a cohort study
Source: Springer Nature journal article supplement (doi:10.1007/s00415-024-12181-y), 2024-01-17
Supplement: MOESM1 [file 26635820]

## Supplementary Tables

**Suppl. Table 1:** Overview of each questionnaire in the explorative analyses

| Questionnaire                               | Abbreviation | Description                                                                                                                                                                                                                                                                                | Rating system                                                                                                                                                                                                                                      | Score range |
|---------------------------------------------|--------------|--------------------------------------------------------------------------------------------------------------------------------------------------------------------------------------------------------------------------------------------------------------------------------------------|----------------------------------------------------------------------------------------------------------------------------------------------------------------------------------------------------------------------------------------------------|-------------|
| The Rivermead Post-Concussion Questionnaire | RPQ          | A 16-item questionnaire designed to measure the severity of post-concussion symptoms.                                                                                                                                                                                                      | A list of post-concussion symptoms (e.g. headache) is rated from a 0 (not experienced) to 4 (a severe problem).                                                                                                                                    | 0-64        |
| Headache Impact Test                        | HIT-6        | A six-item questionnaire designed to measure the burden of headaches with items concerning pain, social functioning, role functioning, vitality, cognitive functioning, and psychological distress                                                                                         | Each item is rated on a 5-point scale (6=never, 8=rarely, 10=sometimes, 11=very often, 13=always).                                                                                                                                                 | 36-78       |
| The Short Form (36) Health Survey           | SF-36        | A 36-item questionnaire designed to measure health status. It is subdivided into eight dimensions: Physical functioning, role limitations due to physical health, bodily pain, general health, vitality, social functioning, role limitations due to emotional problems, and mental health | In six of the eight dimensions, the responses are rated on three or six-point scales, and the remaining two (role limitations) are answered by yes/no questions. Each dimension is converted to a scale from 0 (worst health) to 100 (best health) | 0-100       |
| Bodily Distress Syndrome Checklist          | BDS          | A 25-item questionnaire designed to measure the most common somatic symptoms experienced in functional disorders. It is subdivided into cardiopulmonary/autonomic symptoms, gastrointestinal symptoms, musculoskeletal symptoms, and general symptoms (e.g. headache).                     | Each symptom is rated from a scale from 0 (not bothered at all) to 4 (bothered a lot) within a four week time frame                                                                                                                                | 0-100       |
| Whiteley-8                                  | WI-8         | An eight-item questionnaire designed to measure health anxiety.                                                                                                                                                                                                                            | Each item is rated from a scale from 0 “not bothered at all” to 4 “a lot” within a four week time frame                                                                                                                                            | 0-32        |

**Corresponding author:**

Peter Preben Eggertsen

Hammel Neurorehabilitation Centre and University Research Clinic, Denmark

Email: peter.eggertsen@gmail.com

|                                                          |         |                                                                                                                                                                                                                     |                                                                                                                                                                                                                                                   |                                                              |
|----------------------------------------------------------|---------|---------------------------------------------------------------------------------------------------------------------------------------------------------------------------------------------------------------------|---------------------------------------------------------------------------------------------------------------------------------------------------------------------------------------------------------------------------------------------------|--------------------------------------------------------------|
| The Behavioral Responses to Illness Questionnaire (BRIQ) | BRIQ    | A questionnaire designed to measure the behavior during the acute phase of an illness.<br>Two subscales from BRIQ were used in this study: All-or-nothing behavior (7 items) and limiting behavior (6 items)        | Each item is rated from a scale from 1 “Not at all” to 5 “Every day”                                                                                                                                                                              | All or nothing behavior: 7-35<br><br>Limiting behavior: 6-30 |
| The Brief Illness Perception Questionnaire               | B-IPQ   | A nine-item questionnaire designed to measure illness perception. Item 5 was removed (symptom burden) since this is measured by several other questionnaires. Item 9 was removed since it does not contain a score. | Each item is rated from 0 (no affect at all) to 10 (severely affects my life)                                                                                                                                                                     | 0-70                                                         |
| Symptom Checklist 8 AD                                   | SCL-8AD | A 13-items questionnaire measuring mental distress, including anxiety, depression and emotional distress                                                                                                            | Each item is rated from 0 “not bothered at all” to 4 “a lot” within a 4 week time frame                                                                                                                                                           | 0-52                                                         |
| Perceived Stress Scale (PSS)                             | PSS-10  | A 10-item questionnaire designed to measure the perception of stress                                                                                                                                                | Each item concerns the frequency of certain feelings and thoughts within the last month, and is rated from a scale from 0 (Never) to 4 (Very often). The sum score is achieved by reverse scoring the positive items, and then summing all items. | 0-40                                                         |

**Corresponding author:**

Peter Preben Eggertsen

Hammel Neurorehabilitation Centre and University Research Clinic, Denmark

Email: peter.eggertsen@gmail.com

**Suppl. Table 2:** Post hoc analysis

The delta scores of the subitems of the Bodily Distress Syndrome Checklist (BDS) were correlated to the delta calcitonin gene-related peptide (CGRP) levels in participants with persistent post-concussion symptoms (follow-up minus baseline, n=51). The participants assessed the severity of 25 symptoms over the past four weeks on a scale of 0 (not at all), 1 (a bit), 2 (somewhat), 3 (quite a bit), 4 (a lot).

| <b>During the last four weeks, have you been bothered by....</b> | Baseline BDS score (median, IQR) | Median delta BDS score (follow-up minus baseline, IQR) | Correlation of delta BDS score to delta CGRP (Spearman's rho) | P-value of correlation |
|------------------------------------------------------------------|----------------------------------|--------------------------------------------------------|---------------------------------------------------------------|------------------------|
| <b><i>Cardiopulmonary/autonomic symptoms</i></b>                 |                                  |                                                        |                                                               |                        |
| Palpitations/heart pounding?                                     | 0 (0-1)                          | 0 (-1-0)                                               | 0.36                                                          | 0.0091                 |
| Precordial discomfort?                                           | 0 (0-1)                          | 0 (-1-0)                                               | 0.16                                                          | 0.27                   |
| Breathlessness without exertion?                                 | 0 (0-2)                          | 0 (-1-0)                                               | 0.50                                                          | 0.0002                 |
| Hyperventilation?                                                | 0 (0-0)                          | 0 (0-0)                                                | 0.16                                                          | 0.27                   |
| Hot or cold sweats?                                              | 1 (0-2)                          | 0 (-2-0)                                               | 0.27                                                          | 0.056                  |
| Dry mouth?                                                       | 0 (0-1)                          | 0 (-1-0)                                               | 0.38                                                          | 0.0065                 |
| <b><i>Gastrointestinal symptoms</i></b>                          |                                  |                                                        |                                                               |                        |
| Frequent loose bowel movements?                                  | 0 (0-2)                          | 0 (0-0)                                                | 0.013                                                         | 0.93                   |
| Abdominal pain?                                                  | 1 (0-2)                          | 0 (-1-1)                                               | 0.06                                                          | 0.67                   |
| Feeling bloated/full of gas/distended?                           | 1 (0-2)                          | 0 (-1-1)                                               | 0.10                                                          | 0.49                   |
| Diarrhea?                                                        | 0 (0-0)                          | 0 (0-0)                                                | 0.08                                                          | 0.59                   |
| Regurgitations?                                                  | 0 (0-1)                          | 0 (-1-0)                                               | 0.05                                                          | 0.71                   |
| Nausea?                                                          | 1 (0-3)                          | -1 (-1-0)                                              | 0.20                                                          | 0.15                   |
| Burning sensation of the upper part of stomach/epigastrium?      | 0 (0-1)                          | 0 (0-0)                                                | -0.01                                                         | 0.97                   |
| <b><i>Musculoskeletal symptoms</i></b>                           |                                  |                                                        |                                                               |                        |
| Pain in arms or legs?                                            | 0 (0-1)                          | 0 (-1-0)                                               | 0.06                                                          | 0.66                   |
| Muscular aches or pain?                                          | 1 (0-3)                          | 0 (-1-0)                                               | 0.17                                                          | 0.25                   |
| Pain in the joints?                                              | 0 (0-2)                          | 0 (-1-0)                                               | 0.02                                                          | 0.88                   |
| Feeling paresis or localized weakness?                           | 0 (0-1)                          | 0 (0-0)                                                | 0.22                                                          | 0.13                   |
| Back ache?                                                       | 1 (0-2)                          | 0 (-1-0)                                               | 0.09                                                          | 0.55                   |
| Pain moving from one place to another?                           | 0 (0-0)                          | 0 (0-0)                                                | -0.04                                                         | 0.78                   |
| Unpleasant numbness or tingling sensations?                      | 0 (0-1)                          | 0 (0-0)                                                | 0.20                                                          | 0.16                   |
| <b><i>General symptoms</i></b>                                   |                                  |                                                        |                                                               |                        |
| Concentration difficulties?                                      | 3 (3-4)                          | -1 (-2-0)                                              | 0.10                                                          | 0.51                   |
| Excessive fatigue?                                               | 3 (3-4)                          | 0 (-2-0)                                               | 0.27                                                          | 0.053                  |
| Headache?                                                        | 3 (3-4)                          | -1 (-2-0)                                              | 0.37                                                          | 0.0069                 |
| Impairment of memory?                                            | 3 (2-4)                          | 0 (-1-0)                                               | 0.35                                                          | 0.011                  |
| Dizziness?                                                       | 2 (1-3)                          | -1 (-2-0)                                              | 0.47                                                          | 0.0005                 |
| Total BDS score                                                  | 29 (21-37)                       | -8 (-15 to -2)                                         | 0.54                                                          | <0.0001                |

**Corresponding author:**

Peter Preben Eggertsen

Hammel Neurorehabilitation Centre and University Research Clinic, Denmark

Email: peter.eggertsen@gmail.com
